# Supplementary material for: Effects of Climatic Change on the Potential Distribution of Lycoriella Species (Diptera: Sciaridae) of Economic Importance
Source: MDPI journal article supplement (doi:10.3390/insects12090831), 2021-09-15

Table S1. General circulation models used in ecological niche model projections in RCP 4.5 and RCP 8.5 for 2050.

| General circulation<br>model acronym | Institution                                                                                                                 |
|--------------------------------------|-----------------------------------------------------------------------------------------------------------------------------|
| bnu_esm                              | Beijing Normal University Earth System Model                                                                                |
| cesm1_bcg                            | National Center for Atmospheric Research – The University of Arizona                                                        |
| cesm1_cam5                           | National Center for Atmospheric Research – The University of Arizona – NSF-DOE-NCAR                                         |
| csiro_access1_3                      | Commonwealth Scientific and Industrial Research Organization (CSIRO) and Bureau of Meteorology (BOM), Australia             |
| csiro_access1                        | Commonwealth Scientific and Industrial Research Organization (CSIRO) and Bureau of Meteorology (BOM), Australia             |
| gfdl_cm3                             | NOAA Geophysical Fluid Dynamics Laboratory                                                                                  |
| gfdl_esm2g                           | NOAA Geophysical Fluid Dynamics Laboratory                                                                                  |
| gfdl_esm2m                           | NOAA Geophysical Fluid Dynamics Laboratory                                                                                  |
| giss_e2_r                            | NASA Goddard Institute for Space Studies USA                                                                                |
| giss_e2_h                            | NASA Goddard Institute for Space Studies USA                                                                                |
| inm_cm4                              | Russian Institute for Numerical Mathematics                                                                                 |
| miroc_esm                            | University of Tokyo, National Institute for Environmental Studies, and Japan Agency for Marine-Earth Science and Technology |
| miroc_esm_chem                       | University of Tokyo, National Institute for Environmental Studies, and Japan Agency for Marine-Earth Science and Technology |
| miroc_miroc5                         | University of Tokyo, National Institute for Environmental Studies, and Japan Agency for Marine-Earth Science and Technology |

|                 |                                                              |
|-----------------|--------------------------------------------------------------|
| mohc_hadgem2_cc | UK Met Office Hadley Centre                                  |
| mohc_hadgem2_es | UK Met Office Hadley Centre                                  |
| mri_cgcm3       | Meteorological Research Institute                            |
| ncar_ccsm4      | US National Centre for Atmospheric Research                  |
| ncc_noresm1_m   | Norwegian Climate Centre                                     |
| nimr_hadgem2_ao | UK Met Office Hadley Centre                                  |
| cccma_canesm2   | Canadian Centre for Climate Modelling and Analysis<br>Canada |
| mpi_esm_lr      | Max Planck Institute for Meteorology, Germany                |

---

Table S2. Bibliographic references used for occurrences data of *Lycoriella* species.

### ***Lycoriella agraria***

- Broadley, A., Kauschke, E., & Mohrig, W. (2018). Black fungus gnats (Diptera: Sciaridae) found in association with cultivated plants and mushrooms in Australia, with notes on cosmopolitan pest species and biosecurity interceptions. *Zootaxa*, 4415(2), 201-242.
- El Ouazzani, N. E. H., Heller, K., & Kettani, K. (2019, May). The first checklist of black fungus gnats (Diptera: Sciaridae) of Morocco. In *Annales de la Société entomologique de France (NS)* (Vol. 55, No. 3, pp. 274-290). Taylor & Francis.
- Komarov, S. S. (2009). A review of species of the sciarid-fly genus *Lycoriella* Frey (Diptera, Sciaridae) of the Altai fauna. *Entomological Review*, 89(2), 175-180.
- Menzel, F., Smith, J. E., & Chandler, P. J. (2006). The sciarid fauna of the British Isles (Diptera: Sciaridae), including descriptions of six new species. *Zoological Journal of the Linnean Society*, 146(1), 1-147.
- Mohrig, W., Heller, K., Hippa, H., Vilkamaa, P., & Menzel, F. (2012). Revision of the black fungus gnats (Diptera: Sciaridae) of North America. *Studia dipterologica*, 19(1-2), 141-286.
- Roháček, J., & Ševčík, J. (2009). Diptera of the Poľana Protected Landscape Area-Biosphere Reserve (Central Slovakia). *SNC SR, Administration of the PLA-BR Poľana, Zvolen.. 323p.*

### ***Lycoriella ingenua***

- Andreadis, S. S., Cloonan, K. R., Bellicanta, G. S., Paley, K., Pecchia, J., & Jenkins, N. E. (2016). Efficacy of *Beauveria bassiana* formulations against the fungus gnat *Lycoriella ingenua*. *Biological Control*, 103, 165-171.
- Arimoto, M., Uesugi, R., Hinomoto, N., Sueyoshi, M., & Yoshimatsu, S. I. (2018). Molecular marker to identify the fungus gnat, *Bradysia* sp.(Diptera: Sciaridae), a new pest of Welsh onion and carrot in Japan. *Applied entomology and zoology*, 53(3), 419-424.
- Broadley, A., Kauschke, E., & Mohrig, W. (2018). Black fungus gnats (Diptera: Sciaridae) found in association with cultivated plants and mushrooms in Australia, with notes on cosmopolitan pest species and biosecurity interceptions. *Zootaxa*, 4415(2), 201-242.
- Chidziya, E., Mutangadura, D., Jere, J., & Siziba, L. (2013). A comparative evaluation of locally available substrates for rearing and studying biology of sciarid fly, *Lycoriella mali*. *Academia Journal of Biotechnology*, 1(4), 057-061.
- Jess, S., & Bingham, J. F. W. (2004). The spectral specific responses of *Lycoriella ingenua* and *Megaselia halterata* during mushroom cultivation. *The Journal of Agricultural Science*, 142(4), 421-430.
- Lewandowski, M., Sznyk, A., & Bednarek, A. (2004). Biology and morphometry of *Lycoriella ingenua* (Diptera: Sciaridae). *Biological Letters*, 41(1), 41-50.
- Marín-Cruz, V. H., Cibrián-Tovar, D., Méndez-Montiel, J. T., Pérez-Vera, O. A., Cadena-Meneses, J. A., Huerta, H., ... & Cruz-Rodríguez, J. A. (2015). Biología de

- Lycoriella ingenua* y *Bradysia impatiens* (Diptera: Sciaridae). *Madera y bosques*, 21(1), 113-128.
- Menzel, F., Smith, J. E., & Chandler, P. J. (2006). The sciarid fauna of the British Isles (Diptera: Sciaridae), including descriptions of six new species. *Zoological Journal of the Linnean Society*, 146(1), 1-147.
- Mohrig, W., Heller, K., Hippha, H., Vilkamaa, P., & Menzel, F. (2012). Revision of the black fungus gnats (Diptera: Sciaridae) of North America. *Studia dipterologica*, 19(1-2), 141-286.
- Nickle, W. R., & Cantelo, W. W. (1991). Control of a mushroom-infesting fly, *Lycoriella mali*, with *Steinernema feltiae*. *Journal of Nematology*, 23(1), 145.
- Park, I. K., Kim, J. N., Lee, Y. S., Lee, S. G., Ahn, Y. J., & Shin, S. C. (2008). Toxicity of plant essential oils and their components against *Lycoriella ingenua* (Diptera: Sciaridae). *Journal of Economic Entomology*, 101(1), 139-144.
- Park, J. M., You, Y. H., Park, J. H., Kim, H. H., Ghim, S. Y., & Back, C. G. (2017). Cutaneous microflora from geographically isolated groups of *Bradysia agrestis*, an insect vector of diverse plant pathogens. *Mycobiology*, 45(3), 160-171.
- Szlendak, E., & Lewandowski, M. (2009). Development and reproductive capacity of the predatory mite *Parasitus consanguineus* (Acari: Parasitidae) reared on the larval stages of *Megaselia halterata* and *Lycoriella ingenua*. *Experimental and Applied Acarology*, 47(4), 285-292.
- Ye, L., Leng, R., Huang, J., Qu, C., & Wu, H. (2017). Review of three black fungus gnat species (Diptera: Sciaridae) from greenhouses in China: Three greenhouse sciarids from China. *Journal of Asia-Pacific Entomology*, 20(1), 179-184.
- Yi, J. H., Park, I. K., Choi, K. S., Shin, S. C., & Ahn, Y. J. (2008). Toxicity of medicinal plant extracts to *Lycoriella ingenua* (Diptera: Sciaridae) and *Coboldia fuscipes* (Diptera: Scatopsidae). *Journal of Asia-Pacific Entomology*, 11(4), 221-223.

### ***Lycoriella sativae***

- Broadley, A., Kauschke, E., & Mohrig, W. (2018). Black fungus gnats (Diptera: Sciaridae) found in association with cultivated plants and mushrooms in Australia, with notes on cosmopolitan pest species and biosecurity interceptions. *Zootaxa*, 4415(2), 201-242.
- El Ouazzani, N. E. H., Heller, K., & Kettani, K. (2019, May). The first checklist of black fungus gnats (Diptera: Sciaridae) of Morocco. In *Annales de la Société entomologique de France (NS)* (Vol. 55, No. 3, pp. 274-290). Taylor & Francis.
- Katumanyane, A., Kanzi, A. M., & Malan, A. R. (2020). Sciarid pests (Diptera: Sciaridae) from undercover crop production in South Africa. *South African Journal of Science*, 116(3-4), 1-6.
- Komarov, S. S. (2009). A review of species of the sciarid-fly genus *Lycoriella* Frey (Diptera, Sciaridae) of the Altai fauna. *Entomological Review*, 89(2), 175-180.
- Latibari, M. H., Moravvej, G., Heller, K., Rulik, B., & Namaghi, H. S. (2015). New records of Black Fungus Gnats (Diptera: Sciaridae) from Iran, including the reinstatement of *Bradysia cellarum* Frey. *Studia dipterologica*, 22(1), 39-44.



- Menzel, F., & Müller, W. A. (2010). Trauermücken (Diptera: Sciaridae) aus Pfahlwurzeln von *Rumex obtusifolius* Linnaeus in Südwest-Thüringen (Deutschland), mit Bemerkungen zur Variabilität von *Bradysia scabricornis* Tuomikoski. *Studia dipterologica*, 17(1/2).
- Menzel, F., Gammelmo, Ø., Olsen, K. M., & Köhler, A. (2020). The Black Fungus Gnats (Diptera, Sciaridae) of Norway—Part I: species records published until December 2019, with an updated checklist. *ZooKeys*, 957, 17.
- Menzel, F., Vilkamaa, P., & Smith, J. E. (2013). Overview of the Black Fungus Gnats from the Tristan da Cunha archipelago, including a redescription of *Hyperlasion viridiventris* (Frey) (Diptera: Sciaroidea: Sciaridae). *Beiträge zur Entomologie-Contributions to Entomology*, 63(2), 283-296.
- Mohrig, W., Kauschke, E., & Broadley, A. (2019). Revision of black fungus gnat species (Diptera, Sciaridae) described from the Hawaiian Islands by DE Hardy and WA Steffan, and a contribution to the knowledge of the sciarid fauna of the Galápagos Islands. *Zootaxa*, 4590(4), 401-439.
- Navarro, M. J., Escudero, A., Gea, F. J., López-Lorrio, A., García-Morrás, J. A., & Ferragut, F. (2000). Determinación y abundancia estacional de las poblaciones de dípteros (Diptera: Phoridae y Sciaridae) en los cultivos de champiñón en Castilla-La Mancha. *Boletín de Sanidad Vegetal Plagas*, 4, 527-536.
- Rudzinski, H. G., & Baumjohann, K. (2009). Neue Trauermücken aus Spanien (Diptera: Sciaridae). *Entomologische Zeitschrift*, 119(5), 211-218.
- Shin, S. G., Lee, H. S., & Lee, S. (2012). Dark winged fungus gnats (Diptera: Sciaridae) collected from shiitake mushroom in Korea. *Journal of Asia-Pacific Entomology*, 5(1), 174-181.

Figure S1. Known distribution areas of *Lycoriella agraria*. Occurrences used for calibration and evaluation of the model. Below is shown the accessible area (**M**): 50 km buffer around to all occurrences.

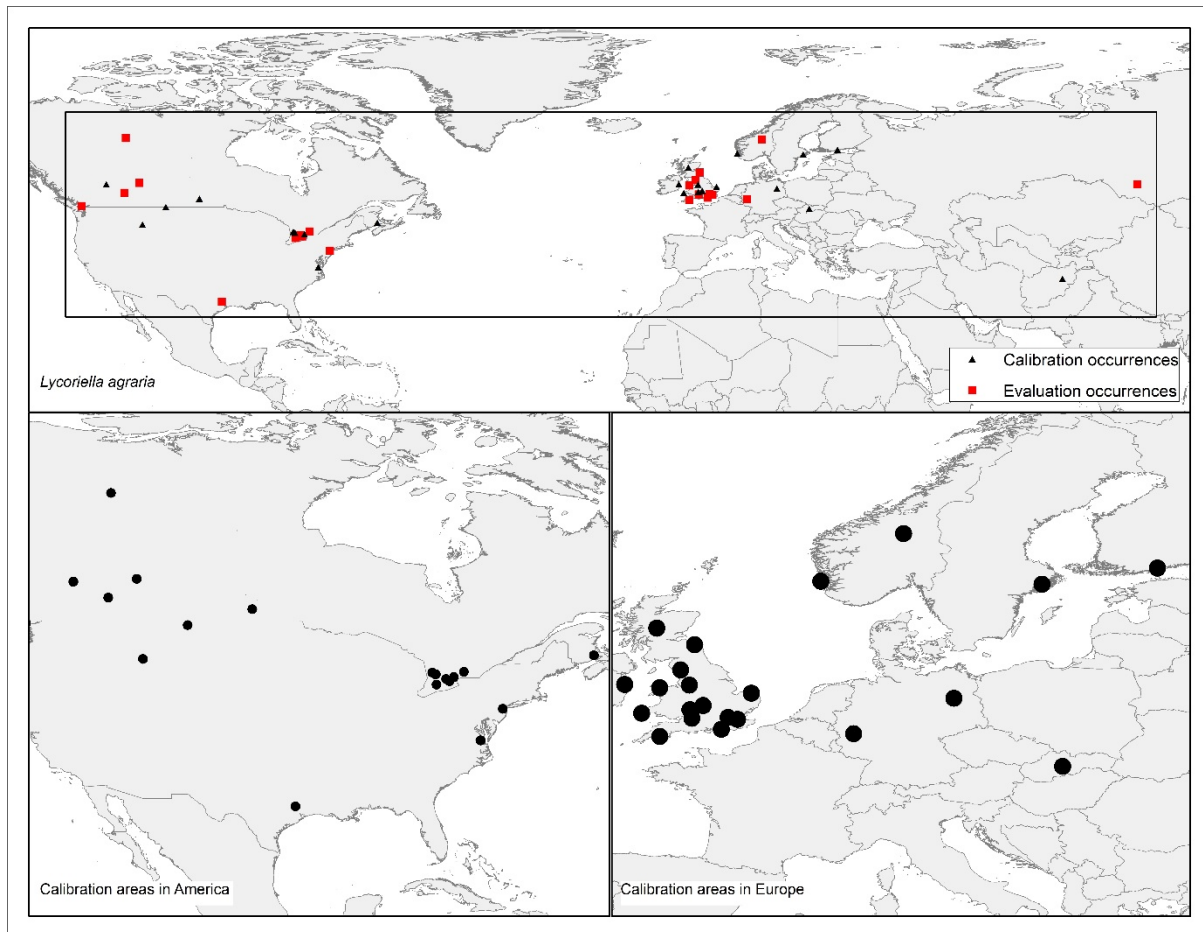

Figure S2. Known distribution areas of *Lycoriella ingenua*: Occurrences used for calibration and evaluation of the model. Below is shown the accessible area (**M**): 50 km buffer around to all occurrences.

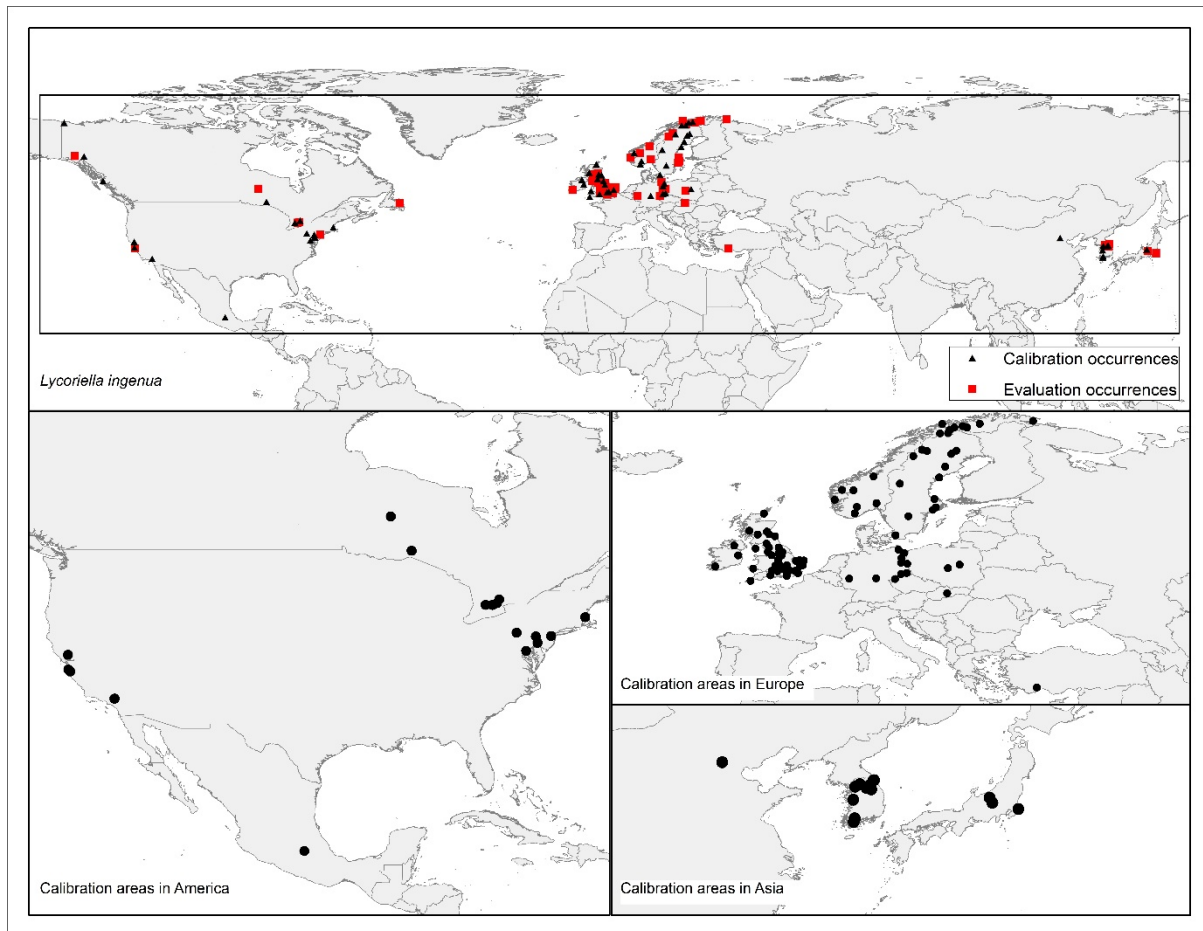

Figure S3. Known distribution areas of *Lycoriella sativae*: Occurrences used for calibration and evaluation of the model. Below is shown the accessible area (**M**): 50 km buffer around to all occurrences.

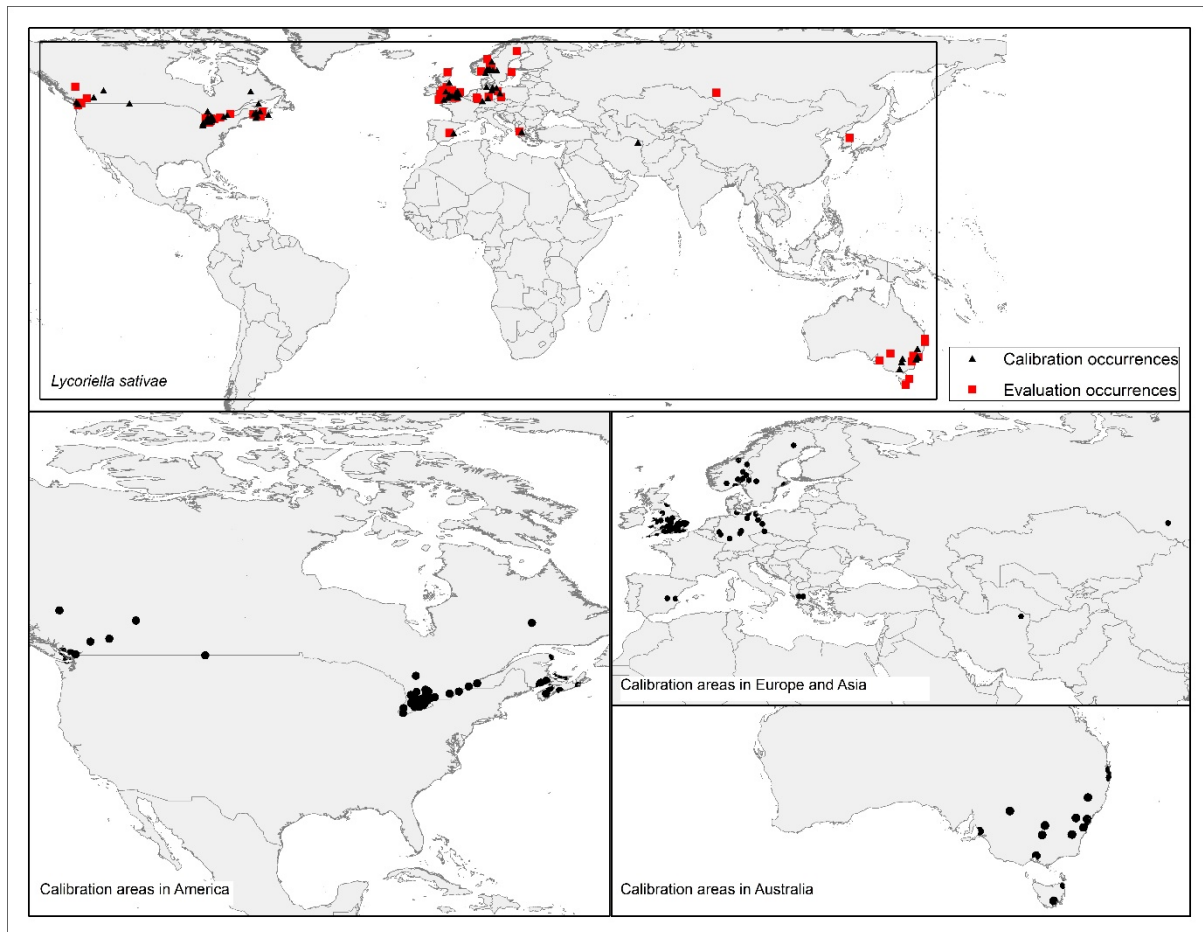

Figure S4. Projections of environmental suitability for *Lycoriella agraria* in current and future scenarios (RCP 4.5 and RCP 8.5) for 2050 in low extrapolation risk areas.

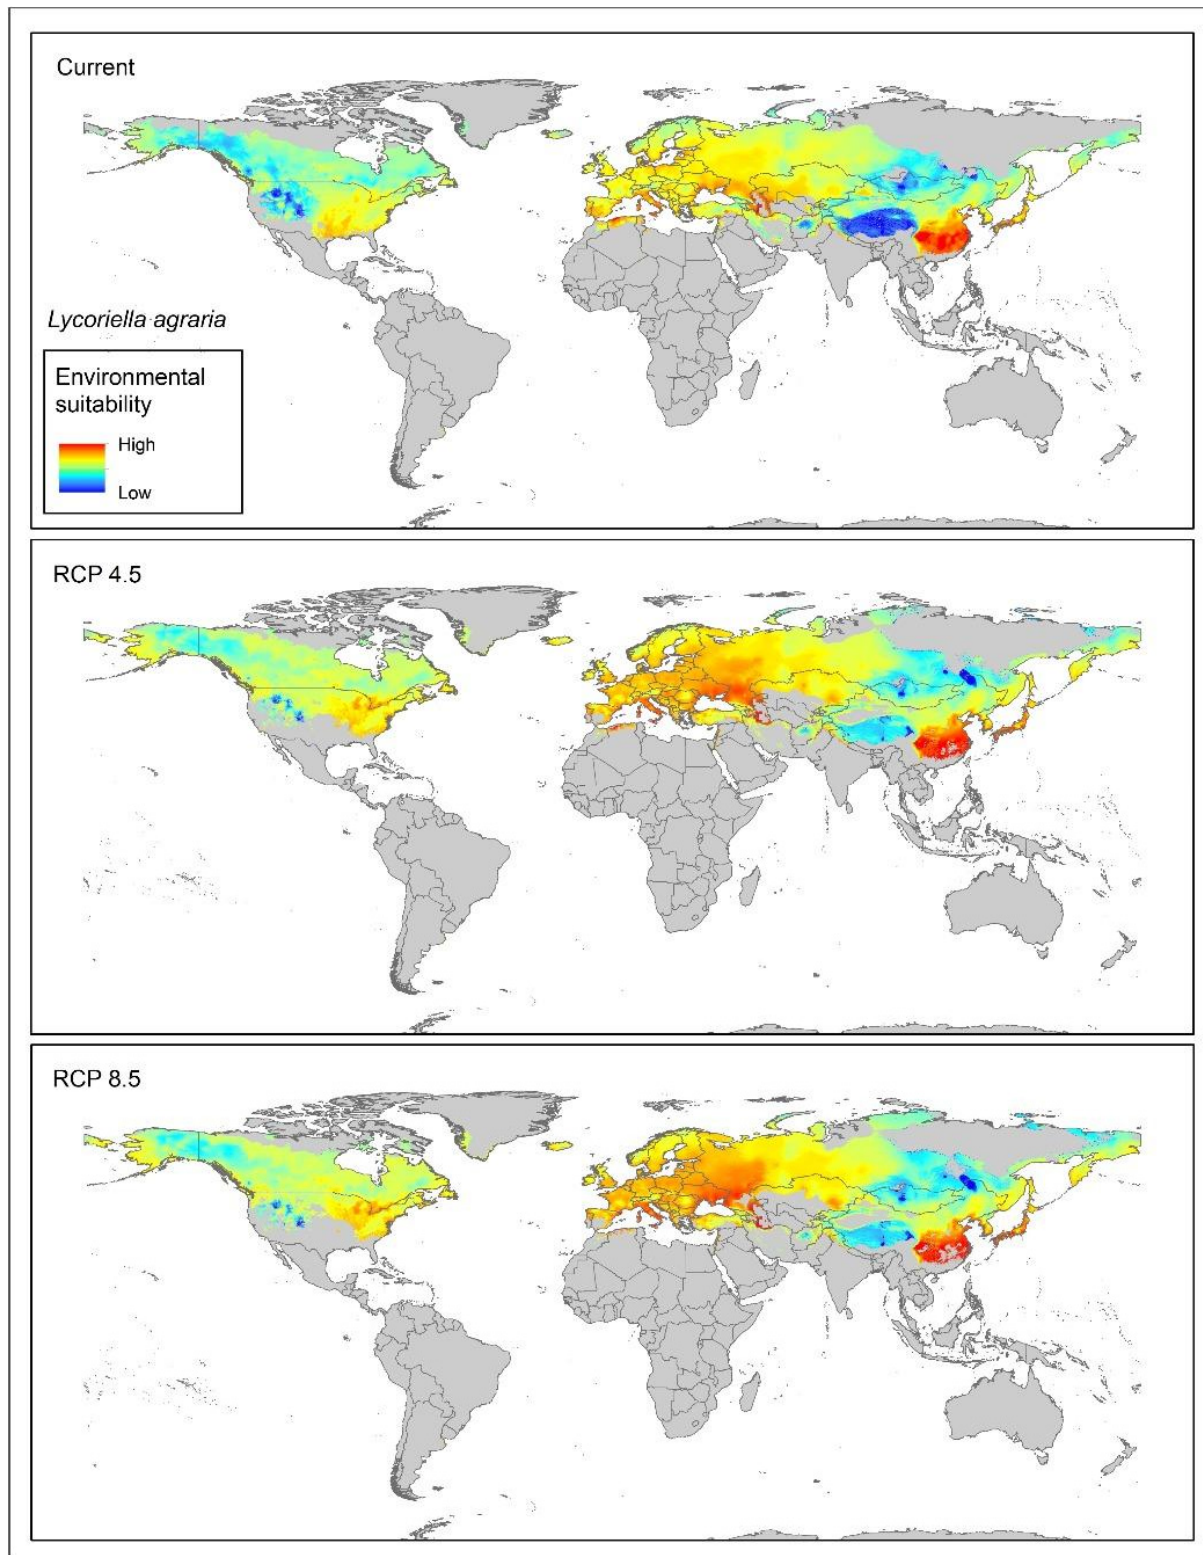



Figure S5. Projections of environmental suitability for *Lycoriella ingenua* in current and future scenarios (RCP 4.5 and RCP 8.5) for 2050 in low extrapolation risk areas.

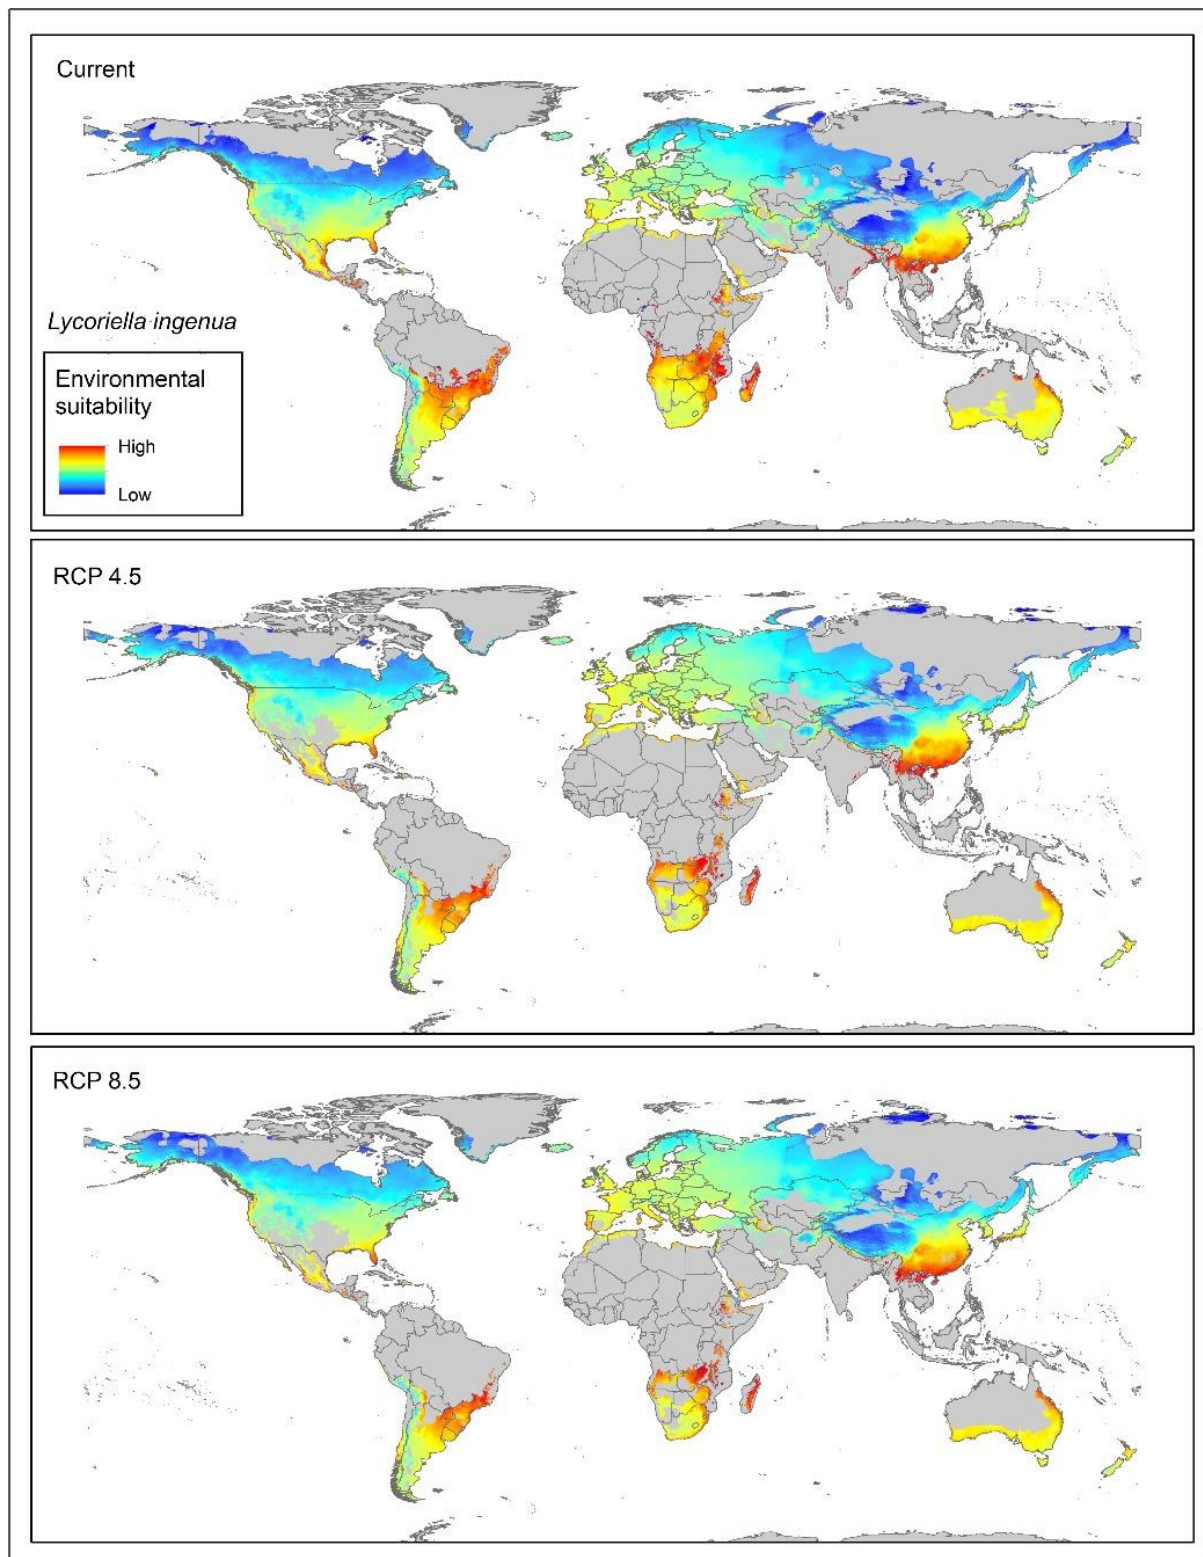

Figure S6. Projections of environmental suitability for *Lycoriella sativae* in current and future scenarios (RCP 4.5 and RCP 8.5) for 2050 in low extrapolation risk areas.

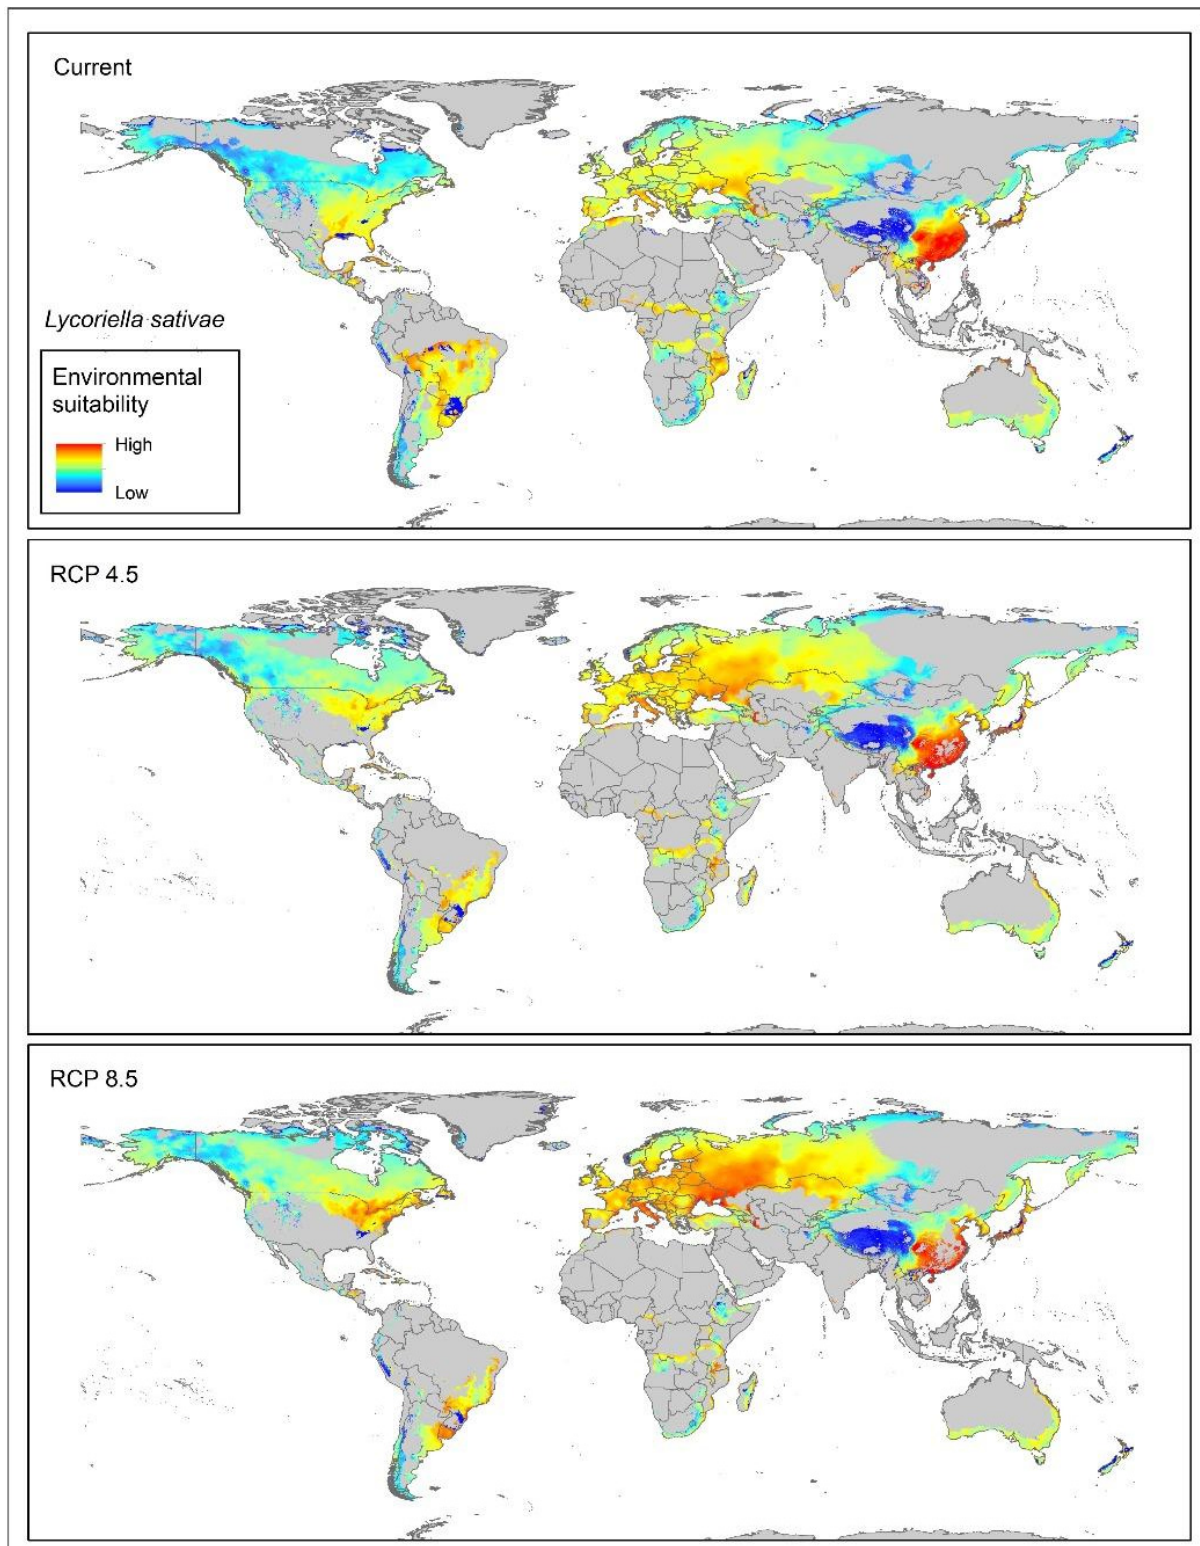

Figure S7. MOP analysis of extrapolation risk from the calibration area under projection current and future conditions for *Lycoriella agraria*. Red areas represent strict extrapolation. Blue areas represent similarity between the calibration area (M) and the RCPs scenarios of projections.

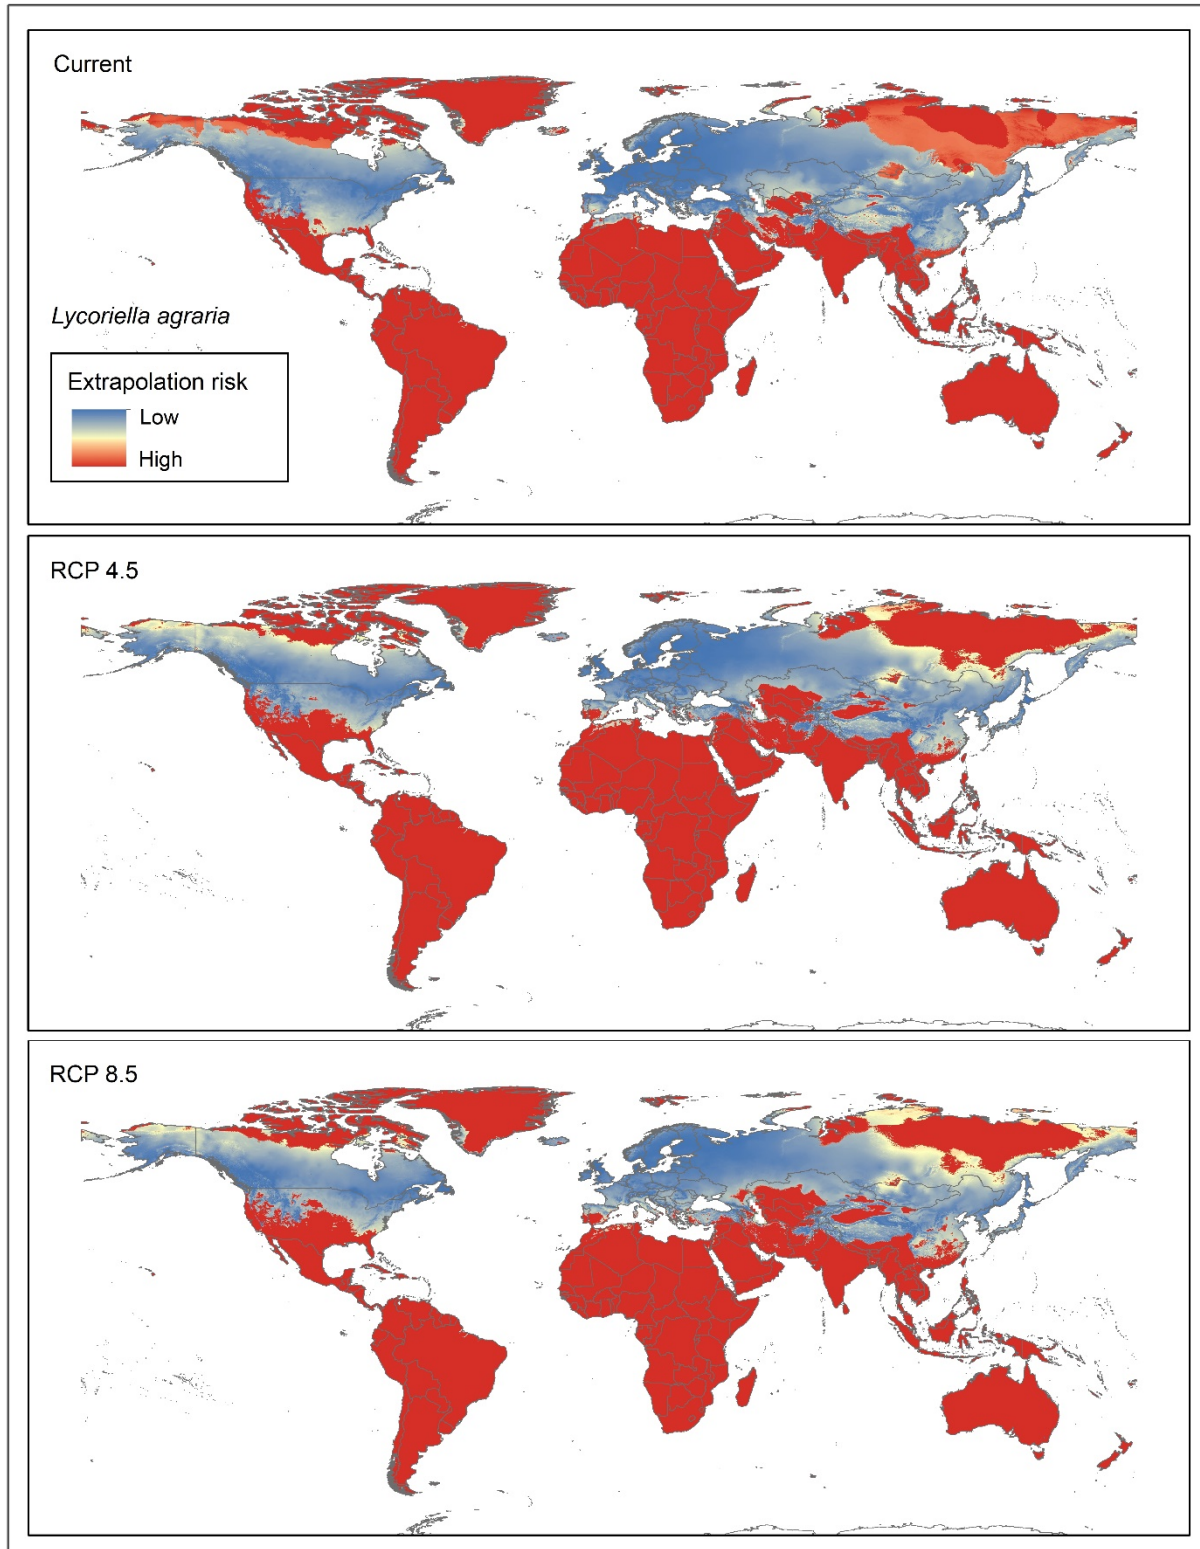



Figure S8. MOP analysis of extrapolation risk from the calibration area under projection current and future conditions for *Lycoriella ingenua*. Red areas represent strict extrapolation. Blue areas represent similarity between the calibration area (M) and the RCPs scenarios of projections.

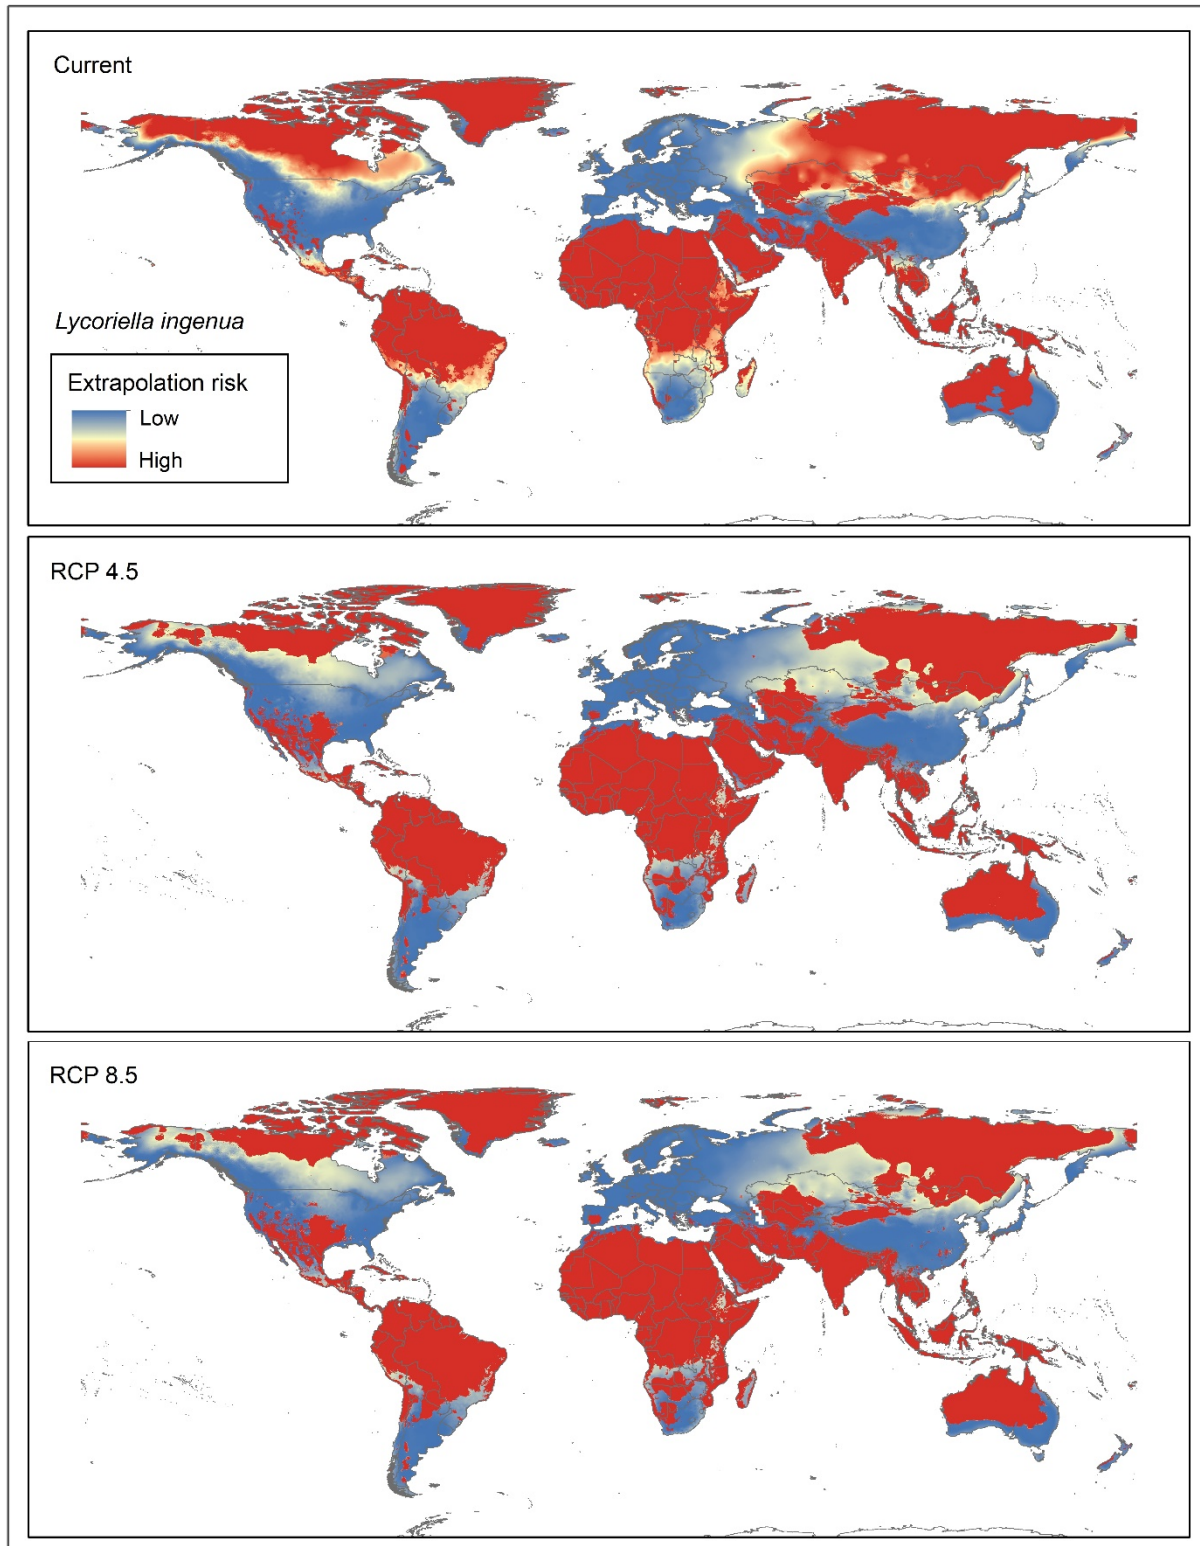

Figure S9. MOP analysis of extrapolation risk from the calibration area under projection current and future conditions for *Lycoriella sativae*. Red areas represent strict extrapolation. Blue areas represent similarity between the calibration area (M) and the RCPs scenarios of projections.

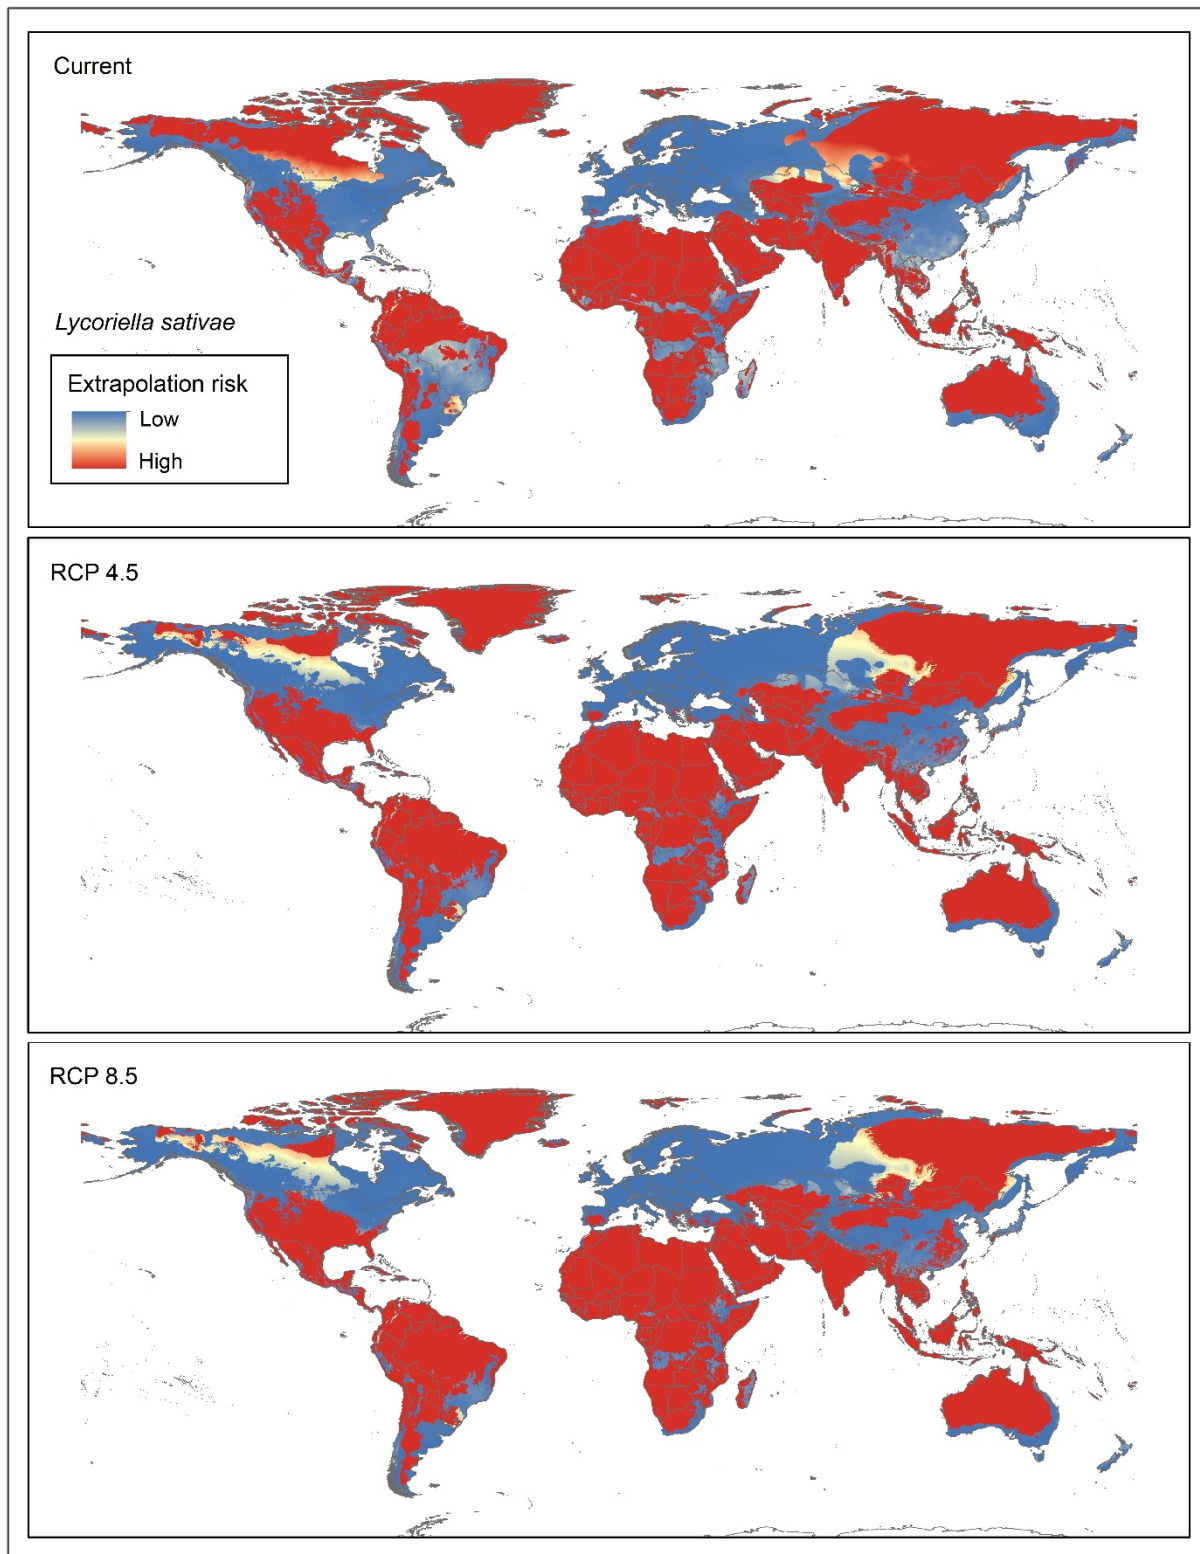

Supplement: s1 [file s1]
